# Supplementary material for: Cloning Should Be Simple: Escherichia coli DH5α-Mediated Assembly of Multiple DNA Fragments with Short End Homologies
Source: PLOS journal article supplement (doi:10.1371/journal.pone.0137466), 2015-09-08
Supplement: S11 (10.1371/journal.pone.0137466.s011) [file journal.pone.0137466.s011]

**S5 Table. Comparison of single and double selections on colony number and the fidelity of the GSU 1371 knockout construct.**

| Sample                   | Selection        | Colonies per transformation | Correct band in colony PCR |
|--------------------------|------------------|-----------------------------|----------------------------|
| Vector only <sup>a</sup> | Amp              | 4                           | N/A                        |
| Assembly <sup>b</sup>    | Amp/Kan          | 61                          | 10/10                      |
| Assembly <sup>b</sup>    | Amp              | 126                         | 27/35                      |
| Assembly <sup>b</sup>    | Kan <sup>c</sup> | 68                          | 10/10                      |

<sup>a</sup> Only the vector fragment (10 ng) was introduced into 25 µl of cells as a negative control.

<sup>b</sup> The insert DNA fragments were first combined with 10 ng of the vector fragment at a 5:1 molar ratio for insert and vector, and then with 25 µl of cells.

<sup>c</sup> Although Kan was the only antibiotic used, this selection was equivalent to double selection because the origin of replication needed in the final product was provided by the vector fragment.
